# Supplementary material for: Hypopituitarism after subarachnoid haemorrhage, do we know enough?
Source: Springer Nature journal article supplement (doi:10.1186/s12883-014-0205-0), 2014-10-13
Supplement: MOESM3 [file 9742098]

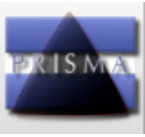

## PRISMA 2009 Flow Diagram

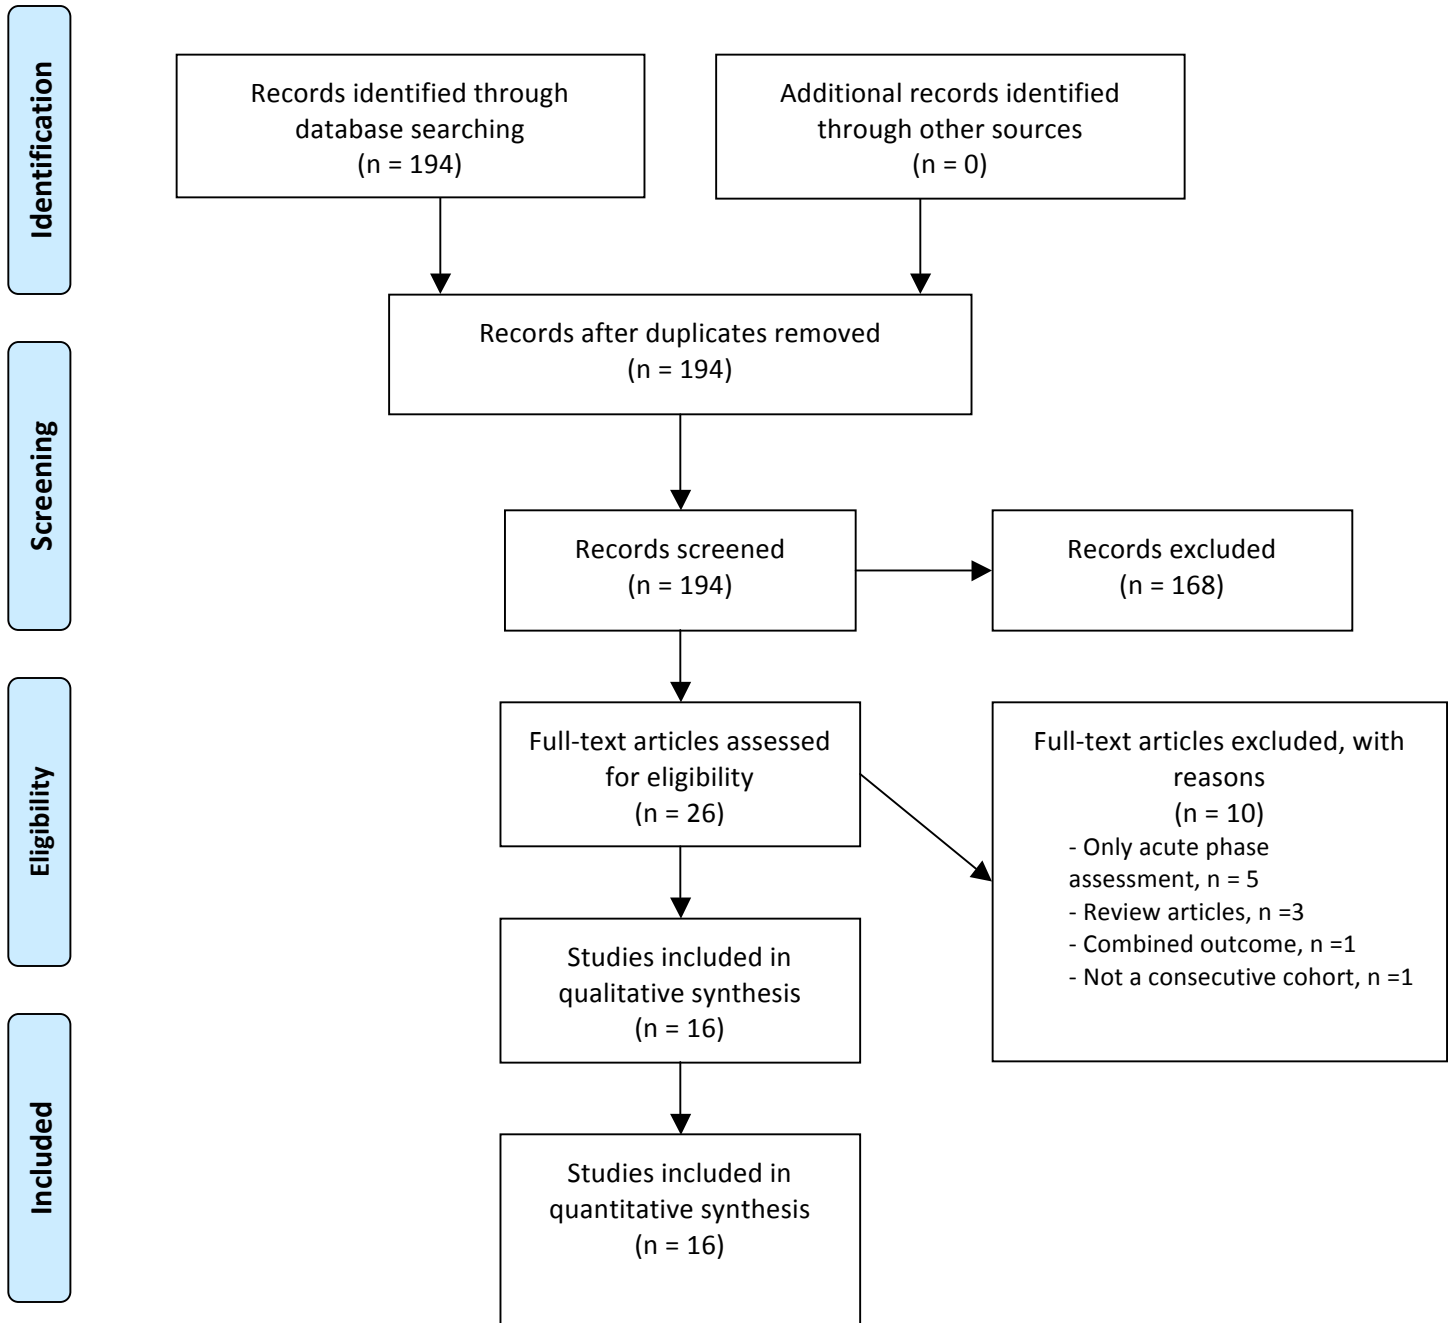

From: Moher D, Liberati A, Tetzlaff J, Altman DG, The PRISMA Group (2009). Preferred Reporting Items for Systematic Reviews and Meta-Analyses: The PRISMA Statement. PLoS Med 6(6): e1000097. doi:10.1371/journal.pmed1000097

For more information, visit [www.prisma-statement.org](http://www.prisma-statement.org).
